# Supplementary material
Source: Elsevier journal article supplement (https://comptes-rendus.academie-sciences.fr/geoscience/article/10.1016/j.crte.2019.09.001/file/attach/mmc1.pdf)
Supplement: mmc1 [file mmc1.pdf]

## Appendix A. Supplementary figures

MK1'

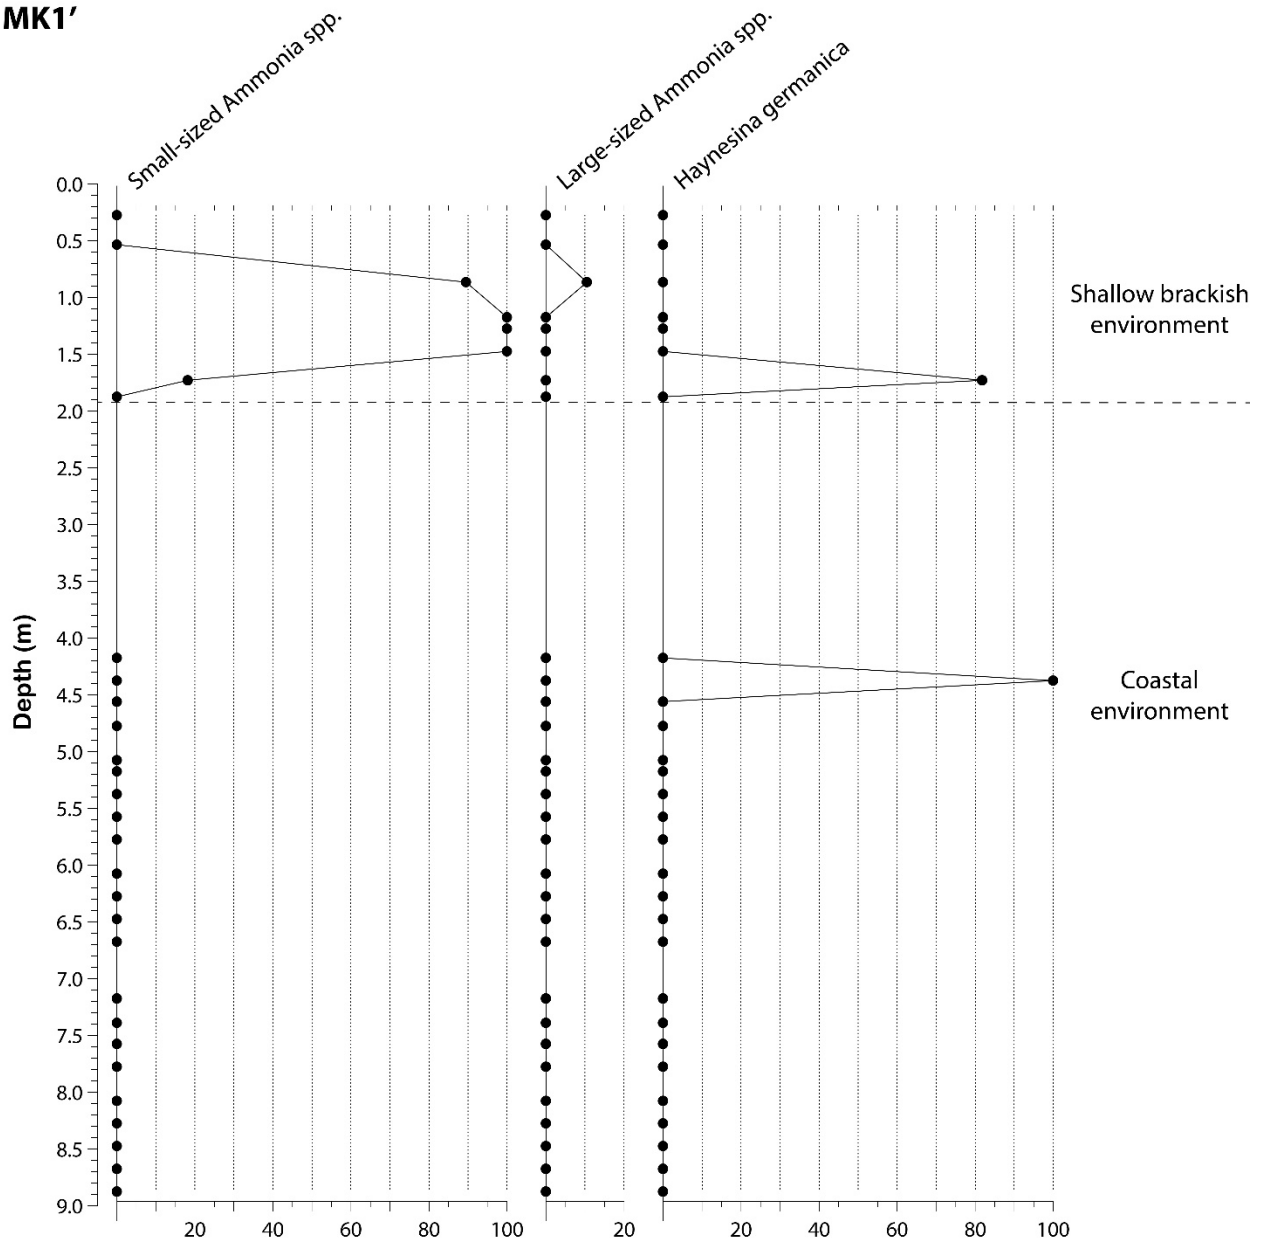

**Fig. A.1:** Foraminiferal species found in core MK1' from Mykali area, in percentage, in relation to the depth of the core. The horizontal dashed line separates depositional environments.

## SALT2

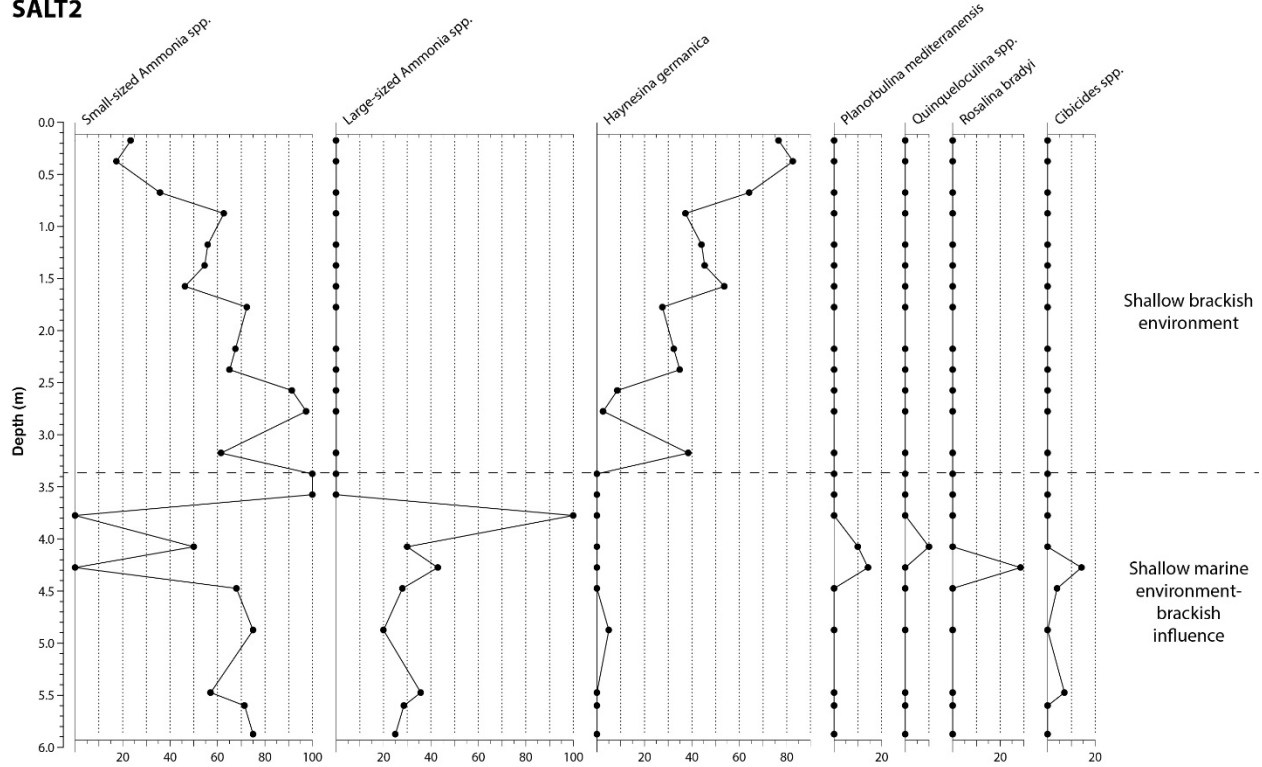

**Fig. A.2:** Foraminiferal species in core SALT2 from Psili Ammos, in percentage, in relation to the depth of the core. The horizontal dashed line separates depositional environments.

### SALT3

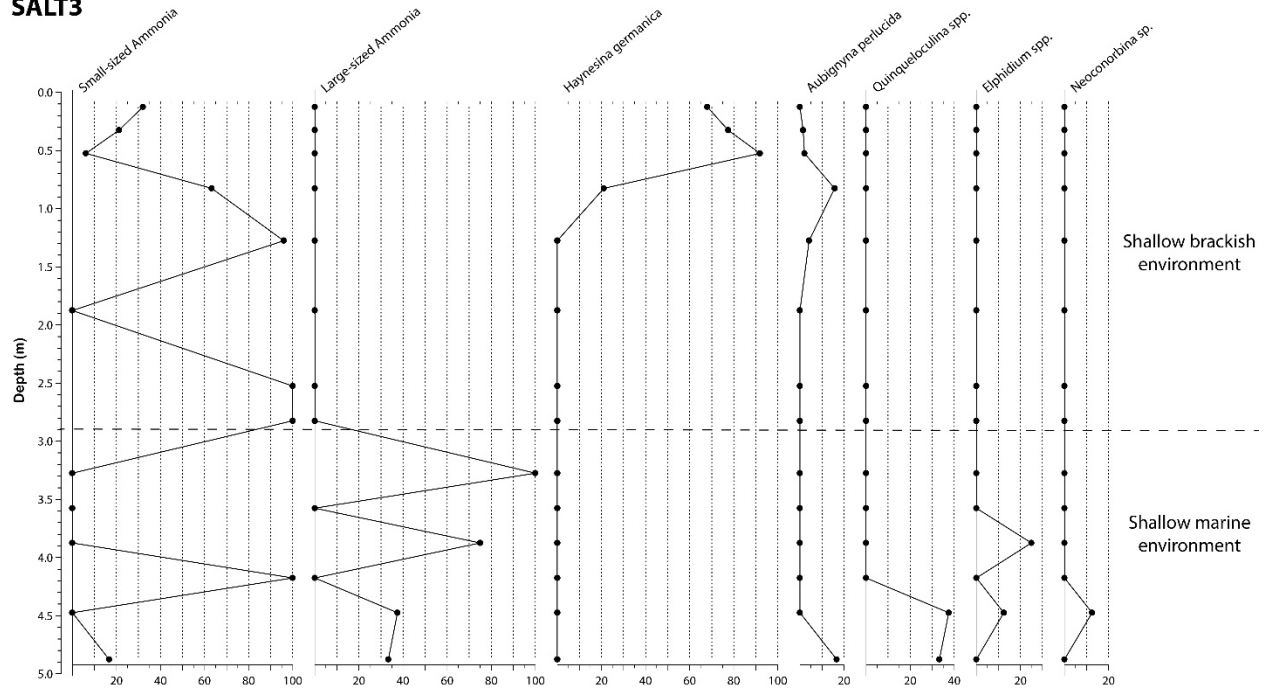

**Fig. A.3:** Foraminiferal species in core SALT3 from Psili Ammos, in percentage, in relation to the depth of the core. The horizontal dashed line separates depositional environments.

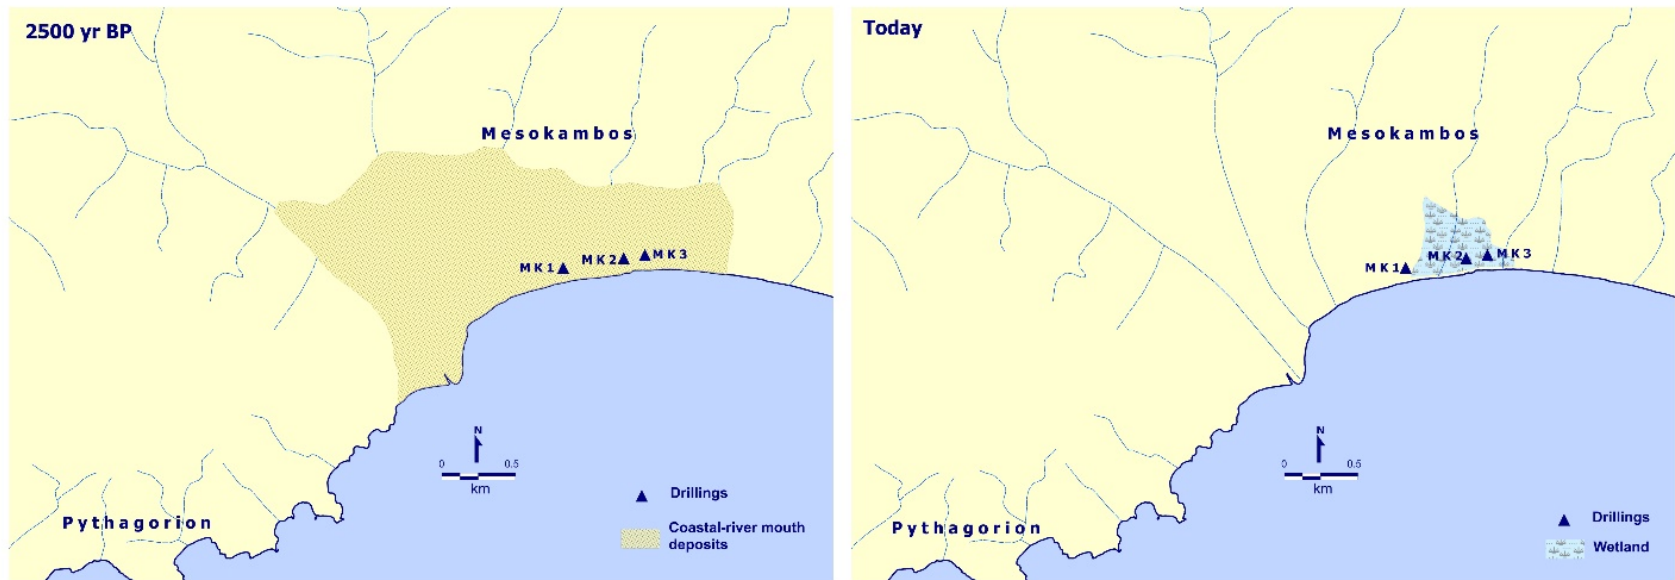

**Fig. A.4:** Mykali palaeogeographical reconstruction about 2500 yr BP in comparison to present geography. The area used to be a coastal – river mouth environment around 2500 yr BP (left) and today is dry land (right).

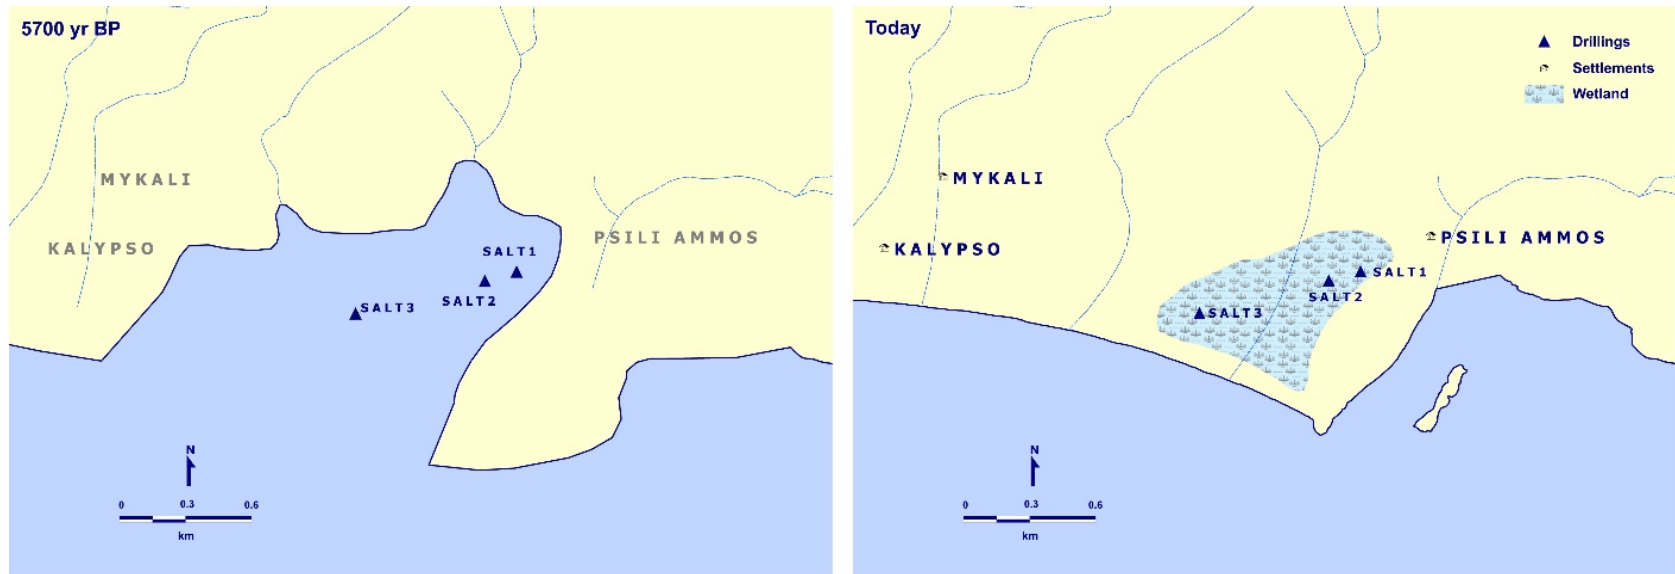

**Fig. A.5:** Psili Ammos palaeogeographical reconstruction about 5700 yr BP in comparison to present geography. The area used to be shallow marine environment with algal vegetation (left) that later turned into a closed lagoon, separated from the sea with a sand spit (right).
